# Supplementary material for: Morphology inherence from hollow MOFs to hollow carbon polyhedrons in preparing carbon-based electrocatalysts
Source: Royal Society of Chemistry journal article supplement (doi:10.1039/c6ta10609a), 2017-01-01
Supplement: c6ta10609a1.pdf [file c6ta10609a1.pdf]

## Supporting Information

### Morphology inheritance from hollow MOFs to hollow carbon polyhedrons in preparing carbon-based electrocatalysts

Yuchen Pei,<sup>†ab</sup> Zhiyuan Qi,<sup>†ab</sup> Xinle Li,<sup>ab</sup> Raghu V. Maligal-Ganesh,<sup>ab</sup> Tian Wei Goh,<sup>ab</sup> Chaoxian Xiao,<sup>a</sup> Tianyu Wang<sup>c</sup> and Wenyu Huang<sup>ab\*</sup>

<sup>a</sup> Department of Chemistry, Iowa State University, Ames, Iowa 50014, United States.

<sup>b</sup> Ames Laboratory, Department of Energy, Ames, Iowa 50014, United States.

<sup>c</sup> Department of Mechanical Engineering, Iowa State University, Ames, Iowa 50011, United States.

<sup>†</sup> These authors contribute equally.

\* E-mail: [whuang@iastate.edu](mailto:whuang@iastate.edu)

## Experimental

### 1. Synthesis of ZIF-control and Cz-ZIF-control

50 mL 0.1 mol/L  $M(\text{NO}_3)_2 \cdot 6\text{H}_2\text{O}$  ( $M = \text{Zn}$  and  $\text{Co}$ ,  $\text{Zn}:\text{Co} = 1:1$ ) methanol solution and 50 mL 0.8 mol/L 2-methyl imidazole methanol solution were prepared separately. Under magnetic stirring, the 2-methylimidazole solution was poured into Zn/Co solution and stirred for 2 hrs. The mixture solution was centrifuged, washed and dried in vacuum. After carbonization following the same procedure as that of HCPs, Cz-ZIF-control was obtained.

**Table S1.** ICP-MS and ICP-OES results.

| samples             | Co /wt. % | Zn /wt. % | Fe /wt. % | weight loss after carbonization /% |
|---------------------|-----------|-----------|-----------|------------------------------------|
| Hollow ZIF-67/8     | 11.4      | 18.6      | -         | -                                  |
| HCPs                | 23.9      | 0.1       | -         | 51.3                               |
| Core/shell ZIF-67/8 | 18.2      | 5.5       | -         | -                                  |
| SCPs                | 41.3      | < 0.1     | -         | 57.7                               |
| Fe/hollow ZIF-67/8  | 16.3      | 27.8      | -         | -                                  |
| 1.0 wt.% Fe/HCPs    | 34.4      | 0.1       | 1.0       | -                                  |
| ZIF-control         | 12.3      | 9.6       | -         | -                                  |
| Cz-ZIF-control      | 41.8      | 1.2       | -         | 48.8                               |
| HCPs-etching        | 8.1       | < 0.1     | -         | -                                  |
| Fe-HCPs-etching     | 11.5      | < 0.1     | 0.9       | -                                  |

**Table S2.** Porosity summary of carbonized materials.

| samples                                                        | HCPs              | SCPs              | Cz-ZIF-control    |
|----------------------------------------------------------------|-------------------|-------------------|-------------------|
| BET surface areas / $\text{m}^2 \cdot \text{g}^{-1}$           | 227               | 282               | 361               |
| Mesoporous volume / $\text{cm}^3 \cdot \text{g}^{-1}$          | 0.47 <sup>a</sup> | 0.35 <sup>a</sup> | 0.60 <sup>c</sup> |
| Microporous volume / $\text{cm}^3 \cdot \text{g}^{-1\text{b}}$ | 0.07              | 0.01              | 0                 |

<sup>a</sup> BJH adsorption from 0.6-400 nm; <sup>b</sup> determined by the t-plot method; and <sup>c</sup> single point (< 291.8 nm) adsorption total pore volume of pores.

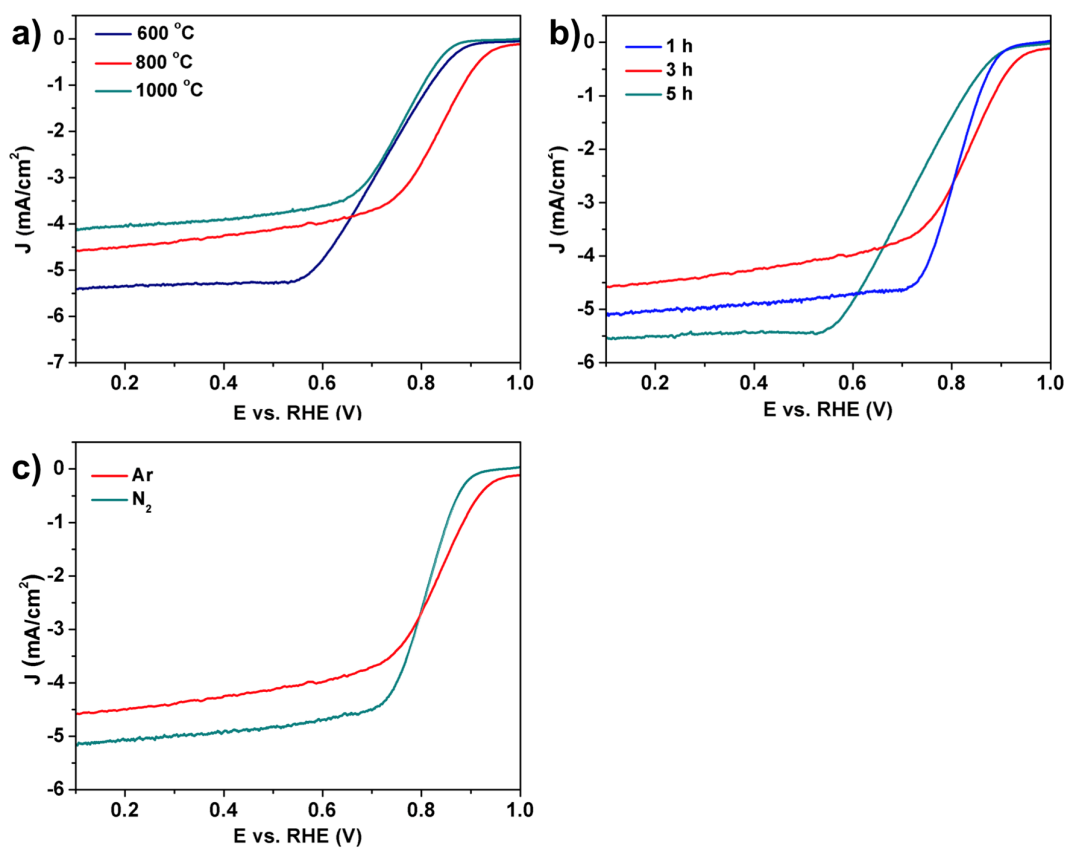

**Figure S1.** ORR performance of a) HCPs carbonized at 600, 800, and 1000 °C for 3 h in Ar; b) HCPs carbonized at 800 °C for 1, 3 and 5 h Ar; and c) HCPs carbonized at 800 °C for 3 h in Ar and N<sub>2</sub>. In all conditions, HCPs prepared at 800 °C for 3 h have the best  $E_{1/2}$ . We did not evaluate the ORR performance of HCPs when employing 10% H<sub>2</sub>/Ar, because most of the carbons in HCPs were removed/decomposed in the presence of H<sub>2</sub> at 800 °C.

**Table S3.** ORR summary of carbon catalysts with different synthesis conditions.

| samples                       | $E_{1/2}$ (V) | $E_{\text{onset}}$ (V) | $J_{\text{limiting}}$ (mA/cm <sup>2</sup> ) at 0.2 V | $J_{\text{kinetic}}$ (mA/cm <sup>2</sup> ) at 0.9 V |
|-------------------------------|---------------|------------------------|------------------------------------------------------|-----------------------------------------------------|
| HCPs-3 h-800 °C-Ar            | 0.821         | 0.948                  | 4.49                                                 | 0.87                                                |
| HCPs-3 h-600 °C-Ar            | 0.718         | 0.875                  | 5.43                                                 | 0.14                                                |
| HCPs-3 h-1000 °C-Ar           | 0.751         | 0.859                  | 4.02                                                 | 0.047                                               |
| HCPs-1 h-800 °C-Ar            | 0.807         | 0.896                  | 5.02                                                 | 0.22                                                |
| HCPs- 5h-800 °C-Ar            | 0.722         | 0.887                  | 5.51                                                 | 0.19                                                |
| HCP-3 h-800 °C-N <sub>2</sub> | 0.805         | 0.888                  | 5.08                                                 | 0.18                                                |

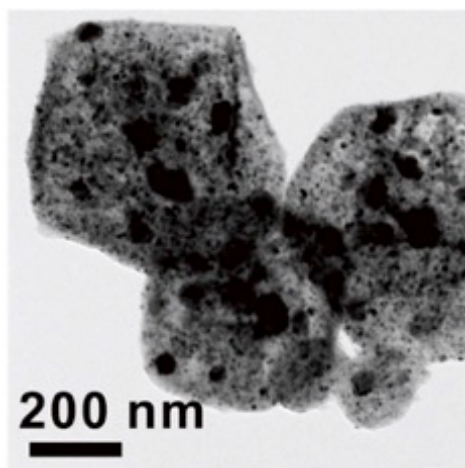

**Figure S2.** TEM image of Fe/HCPs.

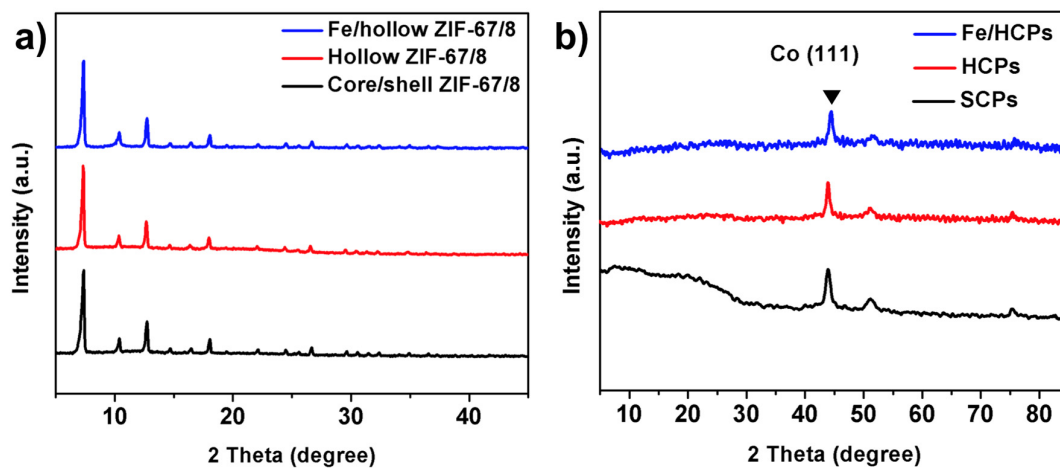

**Figure S3.** PXRD patterns of (a) parent ZIFs, and (b) HCPs, SCPs, and Fe/HCPs.

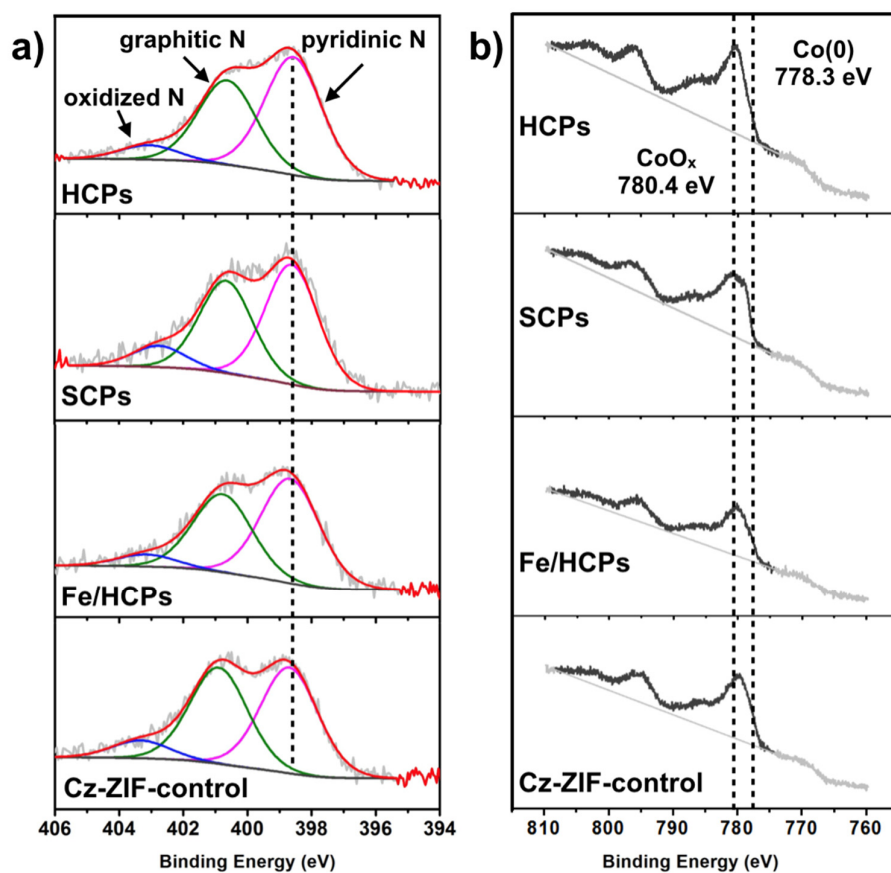

**Figure S4.** XPS spectra of HCPs, SCPs, Fe/HCPs and Cz-ZIF-control: (a) N 1s, and (b) Co 2p.

**Table S4.** XPS analysis of carbonized materials.

| samples        | N /% | Co /% | C /% | Zn /% | Fe /% |
|----------------|------|-------|------|-------|-------|
| HCPs           | 6.7  | 2.2   | 81.9 | 0.1   | -     |
| SCPs           | 5.2  | 3.2   | 84.6 | 0.3   | -     |
| Fe/HCPs        | 5.6  | 2.2   | 83.2 | 0.1   | trace |
| Cz-ZIF-control | 4.7  | 2.2   | 88.2 | -     | -     |

  

| N analysis     | Pyridinic-N<br>(398.6 ± 0.1 eV) /% | Graphitic-N<br>(400.7 ± 0.2 eV) /% | Oxidized N<br>(403.0 ± 0.3 eV) /% |
|----------------|------------------------------------|------------------------------------|-----------------------------------|
| HCPs           | 54.3                               | 39.0                               | 6.6                               |
| SCPs           | 51.2                               | 39.6                               | 9.1                               |
| Fe/HCPs        | 53.7                               | 40.1                               | 6.2                               |
| Cz-ZIF-control | 48.0                               | 43.8                               | 8.1                               |

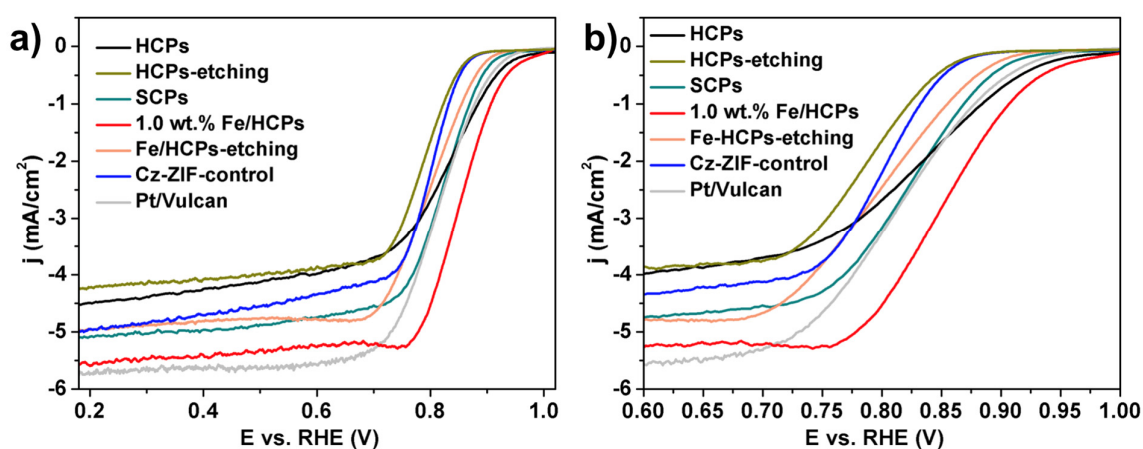**Figure S5.** (a) ORR polarization curves of HCPs, HCPs-etching, SCPs, 1.0 wt.% Fe/HCPs, Fe/HCPs-etching, Cz-ZIF-control, and Pt/Vulcan commercial catalyst. (b) enlarged area of plot a) at the range from 0.65 V to 1.00 V.

**Table S5.** ORR summary of different carbon catalysts.

| samples         | $E_{1/2}$ (V) | $E_{\text{onset}}$ (V) | $J_{\text{limiting}}$ (mA/cm <sup>2</sup> ) at 0.2 V | $J_{\text{kinetic}}$ (mA/cm <sup>2</sup> ) at 0.9 V |
|-----------------|---------------|------------------------|------------------------------------------------------|-----------------------------------------------------|
| HCPs            | 0.821         | 0.948                  | 4.49                                                 | 0.87                                                |
| SCPs            | 0.810         | 0.912                  | 5.08                                                 | 0.40                                                |
| Fe/HCPs         | 0.850         | 0.960                  | 5.59                                                 | 1.47                                                |
| HCPs-etching    | 0.784         | 0.869                  | 4.22                                                 | 0.096                                               |
| Fe/HCPs-etching | 0.799         | 0.900                  | 4.96                                                 | 0.26                                                |
| Cz-ZIF-control  | 0.793         | 0.869                  | 4.94                                                 | 0.10                                                |
| Pt/Vulcan       | 0.812         | 0.925                  | 5.73                                                 | 0.53                                                |

All the current densities were normalized by electrode geometric surface area. The kinetic current was calculated by  $1/j = 1/j_{\text{limiting}} + 1/j_{\text{kinetic}}$ .

**Table S6.** Literature summary of electro-catalytic results of carbon nanostructures in ORR.

| samples                                 | $E_{1/2}$ (V) | $E_{\text{onset}}$ (V) | $J_{\text{limiting}}$ (mA/cm <sup>2</sup> ) <sup>a</sup> | Condition               | Ref. |
|-----------------------------------------|---------------|------------------------|----------------------------------------------------------|-------------------------|------|
| 1:1 Fe-N/carbon nanoshell               | 0.85          | 0.98                   | 5.0 at 0.2 V                                             | 0.1 M KOH               | 1    |
| P-CNCo-20                               | 0.85          | 0.93                   | 5.8 at -0.6 V <sup>b</sup>                               | 0.1 M KOH               | 2    |
| MDC (Cz-ZIF-67)-750°C                   | ~ 0.75        | ~ 0.95                 | ~ 5.5 at 0.2 V                                           | 0.1 M HClO <sub>4</sub> | 3    |
| Co@Co <sub>3</sub> O <sub>4</sub> /NC-1 | 0.80          | ~ 0.90                 | ~ 4.4 at 0.2 V                                           | 0.1 M KOH               | 4    |
| Hollow Fe <sub>3</sub> C/C-700          | 0.83          | 1.05                   | ~ 3.75 at 0.2 V                                          | 0.1 M KOH               | 5    |
| N-MCNSs                                 | ~ 0.67        | ~ 0.82                 | ~ 3.6 at -0.6 V <sup>b</sup>                             | 0.1 M KOH               | 6    |
| ZIF-67-900-AL                           | 0.85          | 0.92                   | ~ 5.2 at 0.4 V                                           | 0.1 M KOH               | 7    |
| FeIM/ZIF-8                              | 0.755         | 0.915                  | -                                                        | 0.1 M KOH               | 8    |

<sup>a</sup> Rotation speed is 1600 rpm; <sup>b</sup> vs. Ag/AgCl.

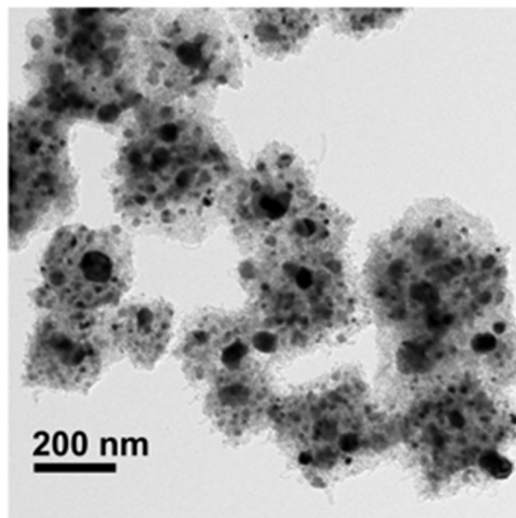

**Figure S6.** TEM image of Cz-ZIF-control. The Cz-ZIF-control was prepared by carbonizing the bimetallic ZIF-control using the mixture of Co and Zn precursors. This sample serves as a control catalyst to evaluate the electrochemical activity of HCPs and SCPs. The average size of Cz-ZIF-control is around 200-300 nm that is similar to that of HCPs and SCPs. The block morphology of Cz-ZIF-control is similar to the parent ZIFs, which evidences the morphology inheritance as well. However, Cz-ZIF-control is not uniform due to that their parent ZIF precursor has random morphologies.

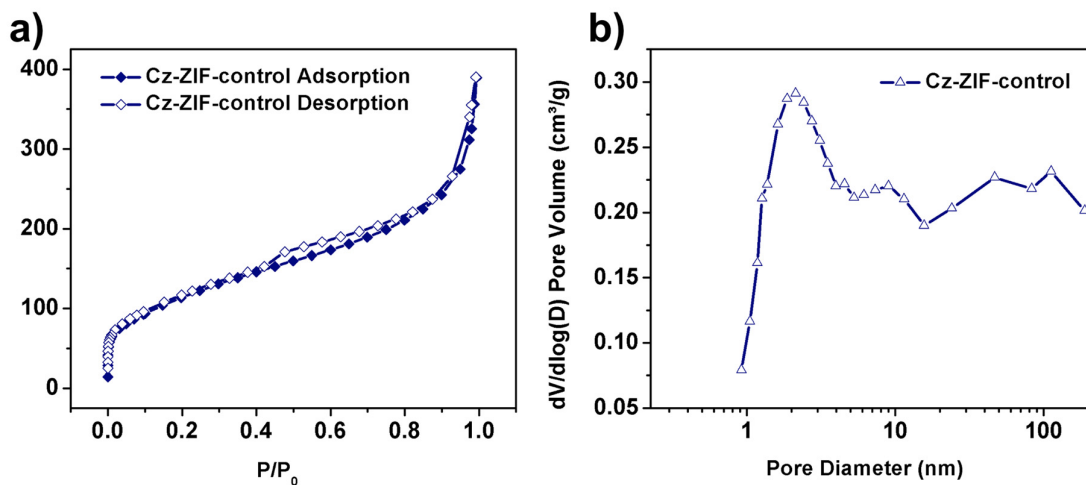

**Figure S7.** (a) N<sub>2</sub> physisorption isotherm and (b) pore size distribution of Cz-ZIF-control.



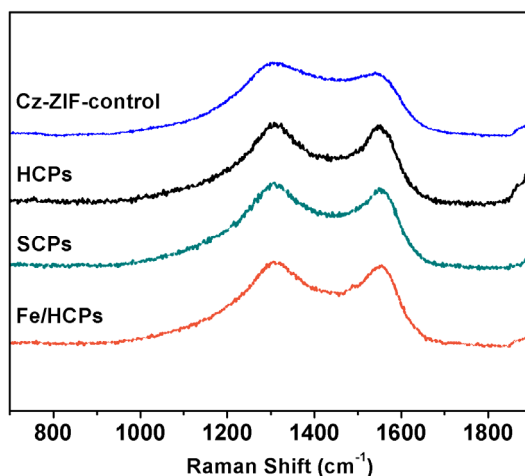

**Figure S8.** Raman spectra of HCPs, SCPs, Fe/HCPs, and Cz-ZIF-control.

**Table S7.** Raman spectra summary.

| samples        | D (cm <sup>-1</sup> ) | I <sub>D</sub> | G (cm <sup>-1</sup> ) | I <sub>G</sub> | I <sub>D</sub> /I <sub>G</sub> |
|----------------|-----------------------|----------------|-----------------------|----------------|--------------------------------|
| HCPs           | 1345                  | 6171           | 1587                  | 6929           | 1.02                           |
| SCPs           | 1345                  | 7363           | 1592                  | 6756           | 1.09                           |
| Fe/HCPs        | 1344                  | 11071          | 1590                  | 10467          | 1.06                           |
| Cz-ZIF-control | 1340                  | 25151          | 1578                  | 21159          | 1.19                           |

All the carbon materials have two similar peaks around 1350 cm<sup>-1</sup> and 1580 cm<sup>-1</sup>, which are the D band and G band of graphitic carbon. The intensity ratio of D band and G band (I<sub>D</sub>/I<sub>G</sub>) is 1.02 for HCPs and 1.06 for Fe/HCPs, indicating these catalysts have similar defect degrees. The peaks positions of Cz-ZIF-control have slightly left shifts, and the I<sub>D</sub>/I<sub>G</sub> ratio is higher compared to that of HCPs and SCPs.

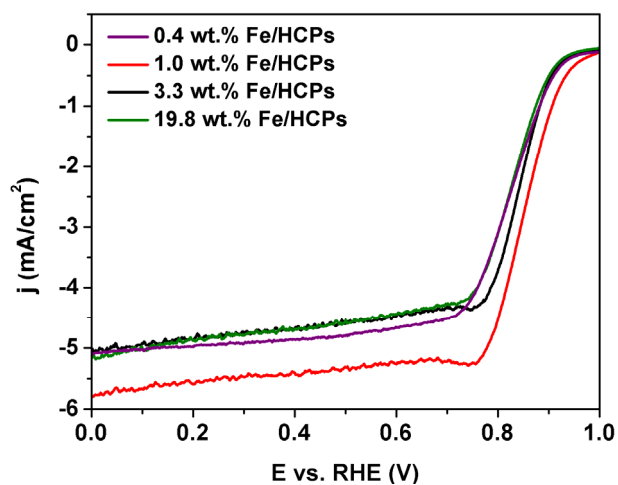

**Figure S9.** ORR polarization curves of Fe/HCPs with 0.4, 1.0, 3.3, and 19.8 wt.% Fe loading. The  $E_{\text{onset}}$  indicates that 1.0 wt.% Fe is the best loading under our reaction conditions. These actual loadings of Fe were measured by ICP-OES.

**Table S8.** ORR summary of carbon catalysts with different Fe loadings.

| samples           | $E_{1/2}$ (V) | $E_{\text{onset}}$ (V) | $J_{\text{limiting}}$ ( $\text{mA}/\text{cm}^2$ ) at 0.2 V | $J_{\text{kinetic}}$ ( $\text{mA}/\text{cm}^2$ ) at 0.9 V |
|-------------------|---------------|------------------------|------------------------------------------------------------|-----------------------------------------------------------|
| 0.4 wt.% Fe/HCPs  | 0.824         | 0.937                  | 4.98                                                       | 0.74                                                      |
| 1.0 wt.% Fe/HCPs  | 0.850         | 0.960                  | 5.59                                                       | 1.47                                                      |
| 3.3 wt.% Fe/HCPs  | 0.840         | 0.929                  | 4.87                                                       | 0.67                                                      |
| 19.8 wt.% Fe/HCPs | 0.823         | 0.925                  | 4.88                                                       | 0.56                                                      |

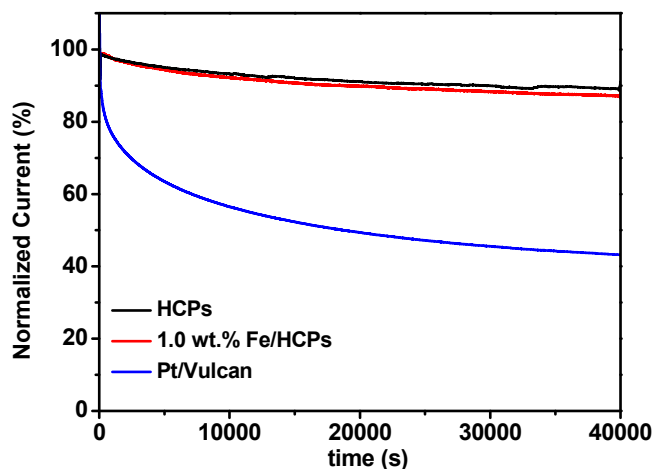

**Figure S10.** Chronoamperometric responses of HCPs, 1.0 wt.% Fe/HCPs, and commercial 20% Pt/Vulcan catalysts kept at 0.65 V vs. RHE in O<sub>2</sub> saturated 0.1 M KOH with a rotational speed of 400 rpm. All the current was normalized by the initial current, and the retained current was shown as a percentage.

## Reference

- 1 Y. Wang, A. Kong, X. Chen, Q. Lin and P. Feng, *ACS Catal.*, 2015, **5**, 3887–3893.
- 2 Y. Z. Chen, C. Wang, Z. Y. Wu, Y. Xiong, Q. Xu, S. H. Yu and H. L. Jiang, *Adv. Mater.*, 2015, **27**, 5010–5016.
- 3 W. Xia, J. Zhu, W. Guo, L. An, D. Xia and R. Zou, *J. Mater. Chem. A*, 2014, **2**, 11606–11613.
- 4 A. Aijaz, J. Masa, C. Rosler, W. Xia, P. Weide, A. J. Botz, R. A. Fischer, W. Schuhmann and M. Muhler, *Angew. Chem. Int. Ed.*, 2016, **55**, 4087–4091.
- 5 Y. Hu, J. O. Jensen, W. Zhang, L. N. Cleemann, W. Xing, N. J. Bjerrum and Q. Li, *Angew. Chem. Int. Ed.*, 2014, **53**, 3675–3679.
- 6 T. Yang, J. Liu, R. Zhou, Z. Chen, H. Xu, S. Z. Qiao and M. J. Monteiro, *J. Mater. Chem. A*, 2014, **2**, 18139–18146.
- 7 X. Wang, J. Zhou, H. Fu, W. Li, X. Fan, G. Xin, J. Zheng and X. Li, *J. Mater. Chem. A*, 2014, **2**, 14064–14070.
- 8 D. Zhao, J. L. Shui, C. Chen, X. Chen, B. M. Reprögle, D. Wang and D. J. Liu, *Chem. Sci.*, 2012, **3**, 3200–3205.
